# Supplementary material for: Opioids for the palliation of symptoms in people with serious respiratory illness: a systematic review and meta-analysis
Source: PubMed Central journal article supplement — Eur Respir Rev. 2024 Oct 9;33(174):230265. doi: 10.1183/16000617.0265-2023 (PMC11462312; doi:10.1183/16000617.0265-2023), 2024-10-09
Supplement: ERR-0265-2023.SUPPLEMENT2.pdf [file ERR-0265-2023.SUPPLEMENT2.pdf]

**Supplementary Table S1: Database search strategy after retrieval of relevant SRs**

| <b>Disease group(s)</b>      | <b>Date range</b>                                         | <b>Database</b>          |
|------------------------------|-----------------------------------------------------------|--------------------------|
| COPD, ILD and bronchiectasis | 1st January 2020 to 8 <sup>th</sup> July 2022             | MEDLINE, CENTRAL         |
| COPD and bronchiectasis      | 1st January 2020 to 8 <sup>th</sup> July 2022             | EMBASE                   |
| ILD                          | 1 <sup>st</sup> January 2019 to 8 <sup>th</sup> July 2022 | EMBASE                   |
| CF                           | 1st of January 2019 to 8 <sup>th</sup> July 2022          | MEDLINE, EMBASE, CENTRAL |
| PHT                          | 1st January 2015 to 8 <sup>th</sup> July 2022             | MEDLINE, EMBASE, CENTRAL |

**Supplementary Table S2: Relevant prior systematic reviews**

| <b>Prior Systematic Review</b> | <b>Relevant Studies</b>                                                                                                                                                                        |
|--------------------------------|------------------------------------------------------------------------------------------------------------------------------------------------------------------------------------------------|
| Bajwah, Colquitt [40]          | None.                                                                                                                                                                                          |
| Barnes, McDonald [18]          | Abernethy, Currow [51]<br><br>Eiser, Denman [46]<br><br>Johnson, Woodcock [47]<br><br>Poole, Veale [54]<br><br>Rice, Kronenberg [55]<br><br>Woodcock, Gross [50]                               |
| Ekström, Nilsson [41]          | Abernethy, Currow [51]<br><br>Eiser, Denman [46]<br><br>Johnson, Woodcock [47]<br><br>Light, Stansbury [49]<br><br>Poole, Veale [54]<br><br>Woodcock, Gross [50]<br><br>Woodcock, Johnson [56] |
| Jaiswal, Singh [39]            | None.                                                                                                                                                                                          |
| Yamaguchi, Saif-Ur-Rahman [42] | Abdallah, Wilkinson-Maitland [45]<br><br>Abernethy, Currow [51]<br><br>Currow, Louw [31]<br><br>Kronborg-White, Andersen [53]                                                                  |

|                                                                             |                                                                                                                                                                                                                                                                                                                                    |
|-----------------------------------------------------------------------------|------------------------------------------------------------------------------------------------------------------------------------------------------------------------------------------------------------------------------------------------------------------------------------------------------------------------------------|
|                                                                             | <p>Eiser, Denman [46]</p> <p>Ferreira, Louw [52]</p> <p>Johnson, Woodcock [47]</p> <p>Kronborg-White, Andersen [53]</p> <p>Light, Muro [48]</p> <p>Light, Stansbury [49]</p> <p>Poole, Veale [54]</p> <p>Verberkt, Van Den Beuken-Van Everdingen [30]</p> <p>Woodcock, Gross [50]</p> <p>Woodcock, Johnson [56]</p>                |
| <p><b>Total included relevant studies from prior systematic reviews</b></p> | <p>Abdallah, Wilkinson-Maitland [45]</p> <p>Abernethy, Currow [51]</p> <p>Currow, Louw [31]</p> <p>Eiser, Denman [46]</p> <p>Ferreira, Louw [52]</p> <p>Johnson, Woodcock [47]</p> <p>Kronborg-White, Andersen [53]</p> <p>Light, Muro [48]</p> <p>Light, Stansbury [49]</p> <p>Poole, Veale [54]</p> <p>Light, Stansbury [49]</p> |

|  |                                                                                                |
|--|------------------------------------------------------------------------------------------------|
|  | Woodcock, Gross [50]<br>Woodcock, Johnson [56]<br>Verberkt, Van Den Beuken-Van Everdingen [30] |
|--|------------------------------------------------------------------------------------------------|

|                     | Random sequence generation (selection bias) | Allocation concealment (selection bias) | Blinding of participants and personnel (performance bias) | Blinding of outcome assessment (detection bias) | Incomplete outcome data (attrition bias) | Selective reporting (reporting bias) | Other bias |
|---------------------|---------------------------------------------|-----------------------------------------|-----------------------------------------------------------|-------------------------------------------------|------------------------------------------|--------------------------------------|------------|
| Abdallah 2017       | +                                           | +                                       | +                                                         | ?                                               | +                                        | +                                    | +          |
| Abernethy 2003      | +                                           | +                                       | +                                                         | +                                               | +                                        | ?                                    | +          |
| Currow 2020         | +                                           | +                                       | +                                                         | +                                               | +                                        | ?                                    | +          |
| Eiser 1991(A)       | ?                                           | ?                                       | +                                                         | +                                               | +                                        | ?                                    | +          |
| Eiser 1991(B)       | ?                                           | ?                                       | +                                                         | +                                               | +                                        | ?                                    | +          |
| Ekstrom 2022        | +                                           | +                                       | +                                                         | +                                               | +                                        | +                                    | +          |
| Ferreira 2018       | +                                           | +                                       | +                                                         | +                                               | +                                        | ?                                    | -          |
| Ferreira 2020       | +                                           | +                                       | +                                                         | +                                               | +                                        | ?                                    | -          |
| Johnson 1983        | +                                           | +                                       | +                                                         | +                                               | +                                        | ?                                    | +          |
| Kronborg-White 2020 | +                                           | +                                       | +                                                         | +                                               | +                                        | +                                    | +          |
| Light 1989          | ?                                           | ?                                       | +                                                         | +                                               | +                                        | ?                                    | +          |
| Light 1996          | ?                                           | ?                                       | +                                                         | +                                               | +                                        | ?                                    | +          |
| Poole 1998          | ?                                           | ?                                       | +                                                         | +                                               | +                                        | ?                                    | +          |
| Rice 1987           | ?                                           | ?                                       | +                                                         | +                                               | +                                        | ?                                    | -          |
| Verberkt 2020       | +                                           | +                                       | +                                                         | +                                               | +                                        | -                                    | +          |
| Woodcock 1981       | ?                                           | ?                                       | +                                                         | +                                               | +                                        | -                                    | +          |
| Woodcock 1982       | ?                                           | ?                                       | +                                                         | +                                               | +                                        | ?                                    | +          |

Supplementary Figure S1: Risk of Bias Summary

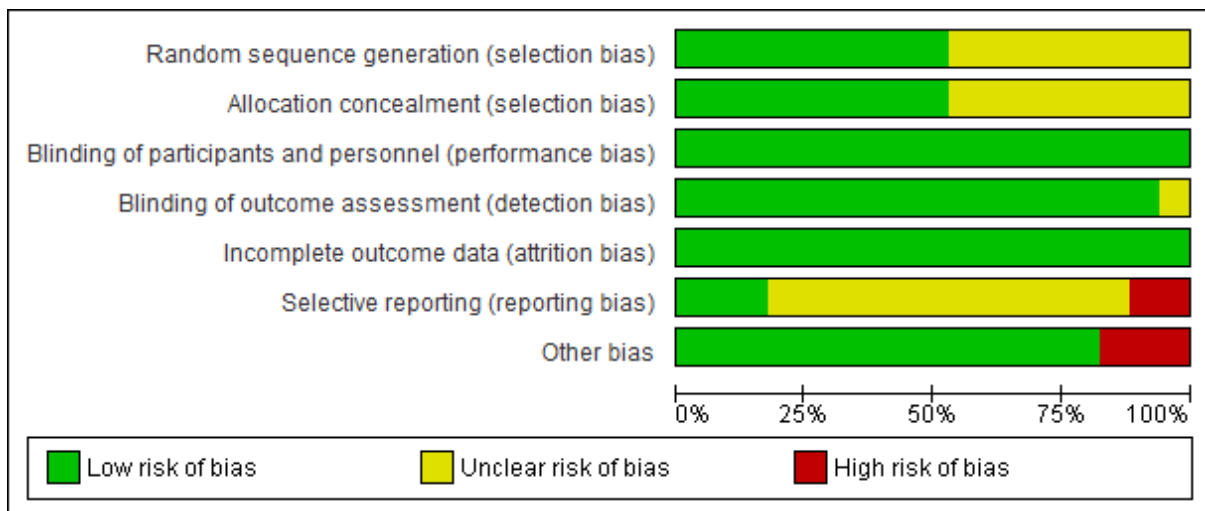

Supplementary Figure S2: Risk of bias domains

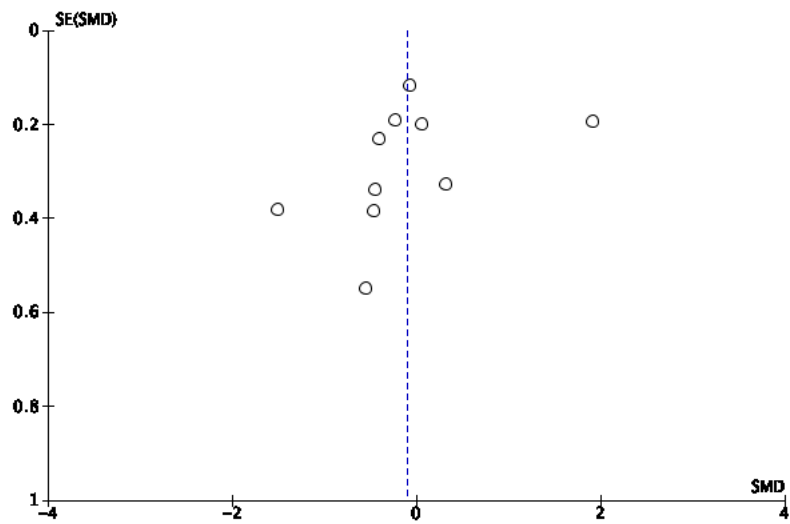

Supplementary Figure S3: Funnel plot for at home studies reporting breathlessness pragmatically during daily life

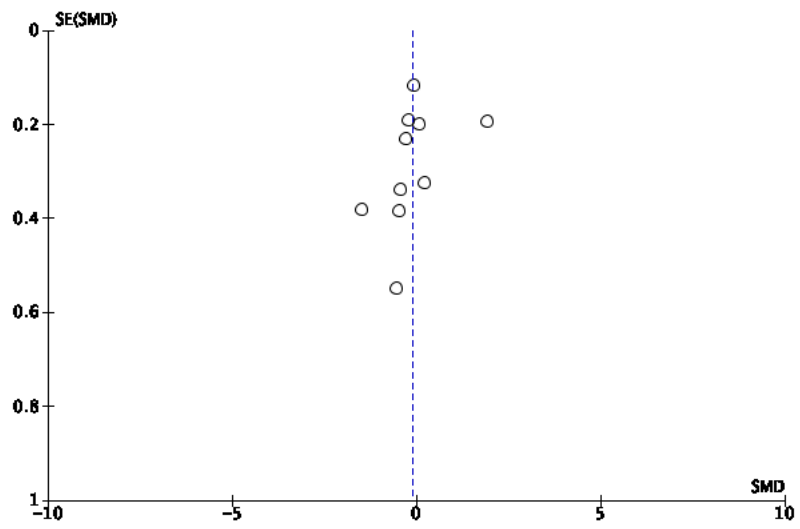

Supplementary Figure S4: Funnel plot for at home studies reporting breathlessness pragmatically during daily life using morning scores when available



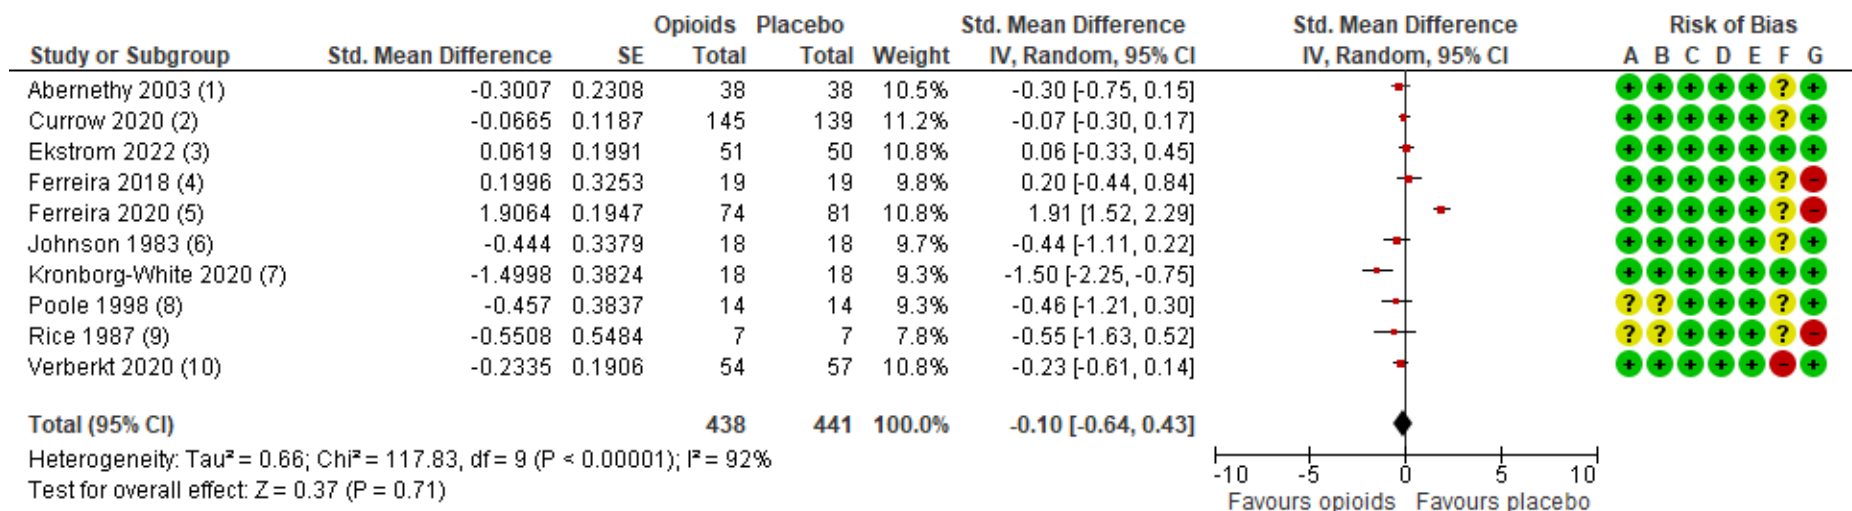

**Footnotes**

- (1) 10cm VAS breathlessness intensity (final morning relative to baseline)
- (2) 10cm VAS breathlessness intensity NOW (days 5-7 average of mean morning/evening scores relative to...)
- (3) NRS intensity of breathlessness (16mg/day dose, days 5 to 7 average scores relative to days -3 to -1 average...)
- (4) 10cm VAS breathlessness intensity NOW (final evening score relative to baseline)
- (5) 10cm VAS breathlessness intensity NOW (days 5-7 average of mean morning/evening scores relative to...)
- (6) 10cm VAS breathlessness (final early evening relative to baseline from alternating weeks period)
- (7) 10cm VAS breathlessness during LAST HOUR (change from baseline to followup)
- (8) CRQ Dyspnea subscale (change from baseline to 6-weeks)
- (9) 10cm VAS breathlessness during PAST 24 HOURS (change from baseline to followup)
- (10) NRS over PAST 24 HOURS (change from baseline to followup)

**Risk of bias legend**

- (A) Random sequence generation (selection bias)
- (B) Allocation concealment (selection bias)
- (C) Blinding of participants and personnel (performance...)
- (D) Blinding of outcome assessment (detection bias)
- (E) Incomplete outcome data (attrition bias)
- (F) Selective reporting (reporting bias)
- (G) Other bias

**Supplementary Figure S5: At home studies reporting breathlessness pragmatically during daily life using morning scores when available**

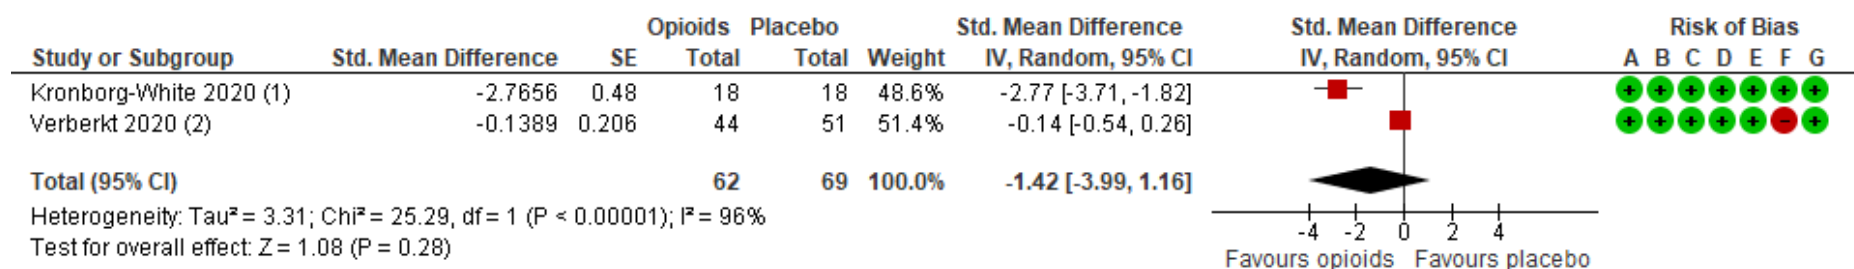

Footnotes

- (1) Leicester Cough Score (change from baseline)
- (2) CAT Cough subscore (raw score at one month)

Risk of bias legend

- (A) Random sequence generation (selection bias)
- (B) Allocation concealment (selection bias)
- (C) Blinding of participants and personnel (performance...)
- (D) Blinding of outcome assessment (detection bias)
- (E) Incomplete outcome data (attrition bias)
- (F) Selective reporting (reporting bias)
- (G) Other bias

Supplementary Figure S6: At home studies reporting cough

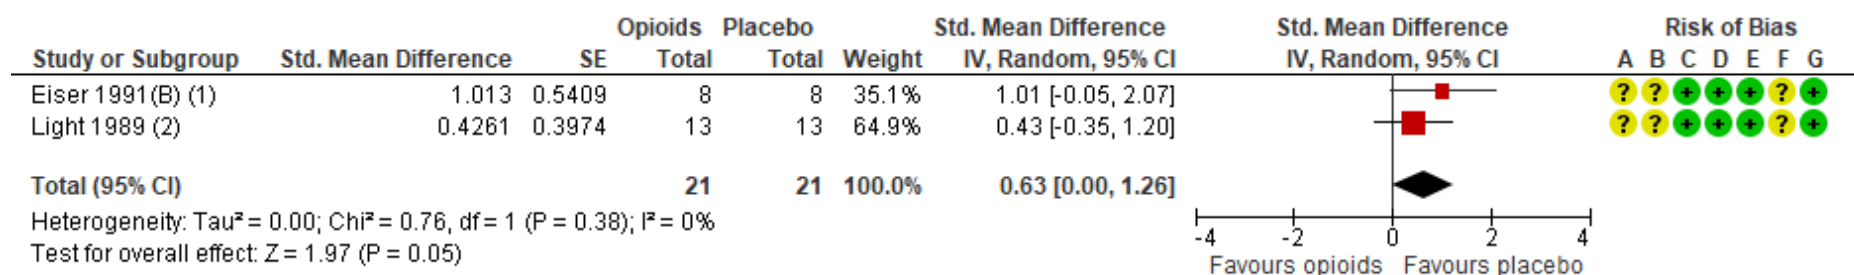

Footnotes

- (1) 1 hour post-dose
- (2) at isotime

Risk of bias legend

- (A) Random sequence generation (selection bias)
- (B) Allocation concealment (selection bias)
- (C) Blinding of participants and personnel (performance...)
- (D) Blinding of outcome assessment (detection bias)
- (E) Incomplete outcome data (attrition bias)
- (F) Selective reporting (reporting bias)
- (G) Other bias

Supplementary Figure S7: Laboratory-based exercise studies reporting arterial blood gases (partial pressure of carbon dioxide)

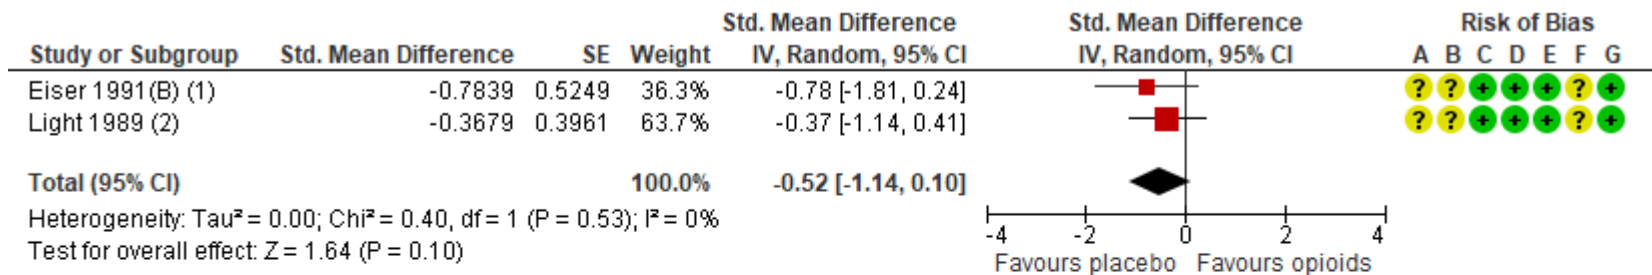

Footnotes

- (1) 1 hour post-dose
- (2) at isotime

Risk of bias legend

- (A) Random sequence generation (selection bias)
- (B) Allocation concealment (selection bias)
- (C) Blinding of participants and personnel (performance...)
- (D) Blinding of outcome assessment (detection bias)
- (E) Incomplete outcome data (attrition bias)
- (F) Selective reporting (reporting bias)
- (G) Other bias

Supplementary Figure S8: Laboratory-based exercise studies reporting arterial blood gases (partial pressure of oxygen)

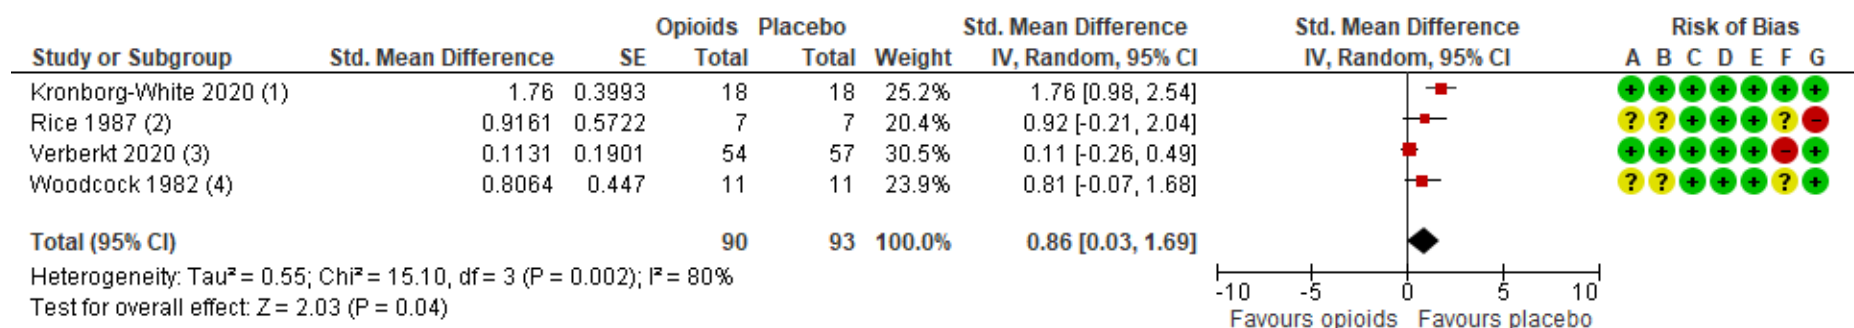

Footnotes

- (1) Change from baseline
- (2) Raw score at follow up
- (3) change from baseline
- (4) Raw score at follow up

Risk of bias legend

- (A) Random sequence generation (selection bias)
- (B) Allocation concealment (selection bias)
- (C) Blinding of participants and personnel (performance...)
- (D) Blinding of outcome assessment (detection bias)
- (E) Incomplete outcome data (attrition bias)
- (F) Selective reporting (reporting bias)
- (G) Other bias

Supplementary Figure S9: At home studies reporting arterial blood gases (partial pressure of carbon dioxide)

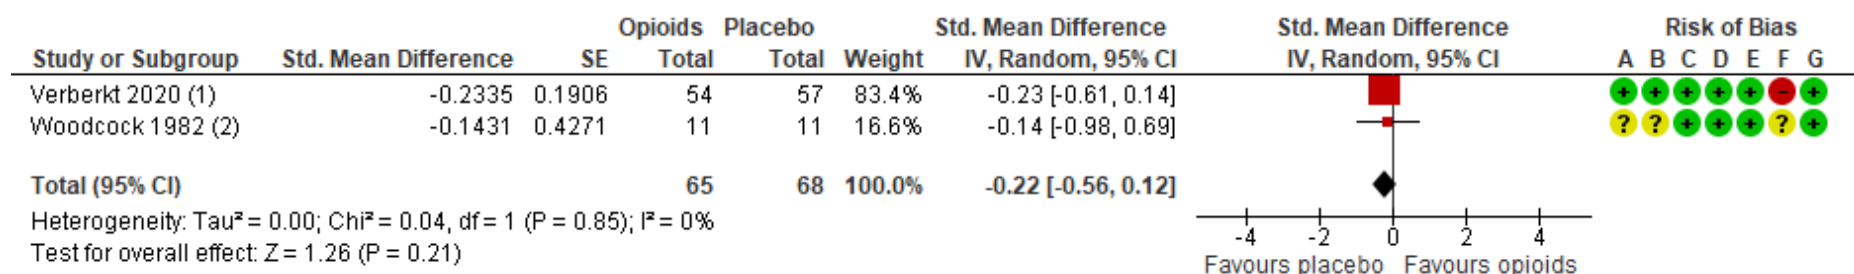

Footnotes

- (1) change from baseline
- (2) Raw score at follow up

Risk of bias legend

- (A) Random sequence generation (selection bias)
- (B) Allocation concealment (selection bias)
- (C) Blinding of participants and personnel (performance...)
- (D) Blinding of outcome assessment (detection bias)
- (E) Incomplete outcome data (attrition bias)
- (F) Selective reporting (reporting bias)
- (G) Other bias

Supplementary Figure S10: At home studies reporting arterial blood gases (partial pressure of oxygen)

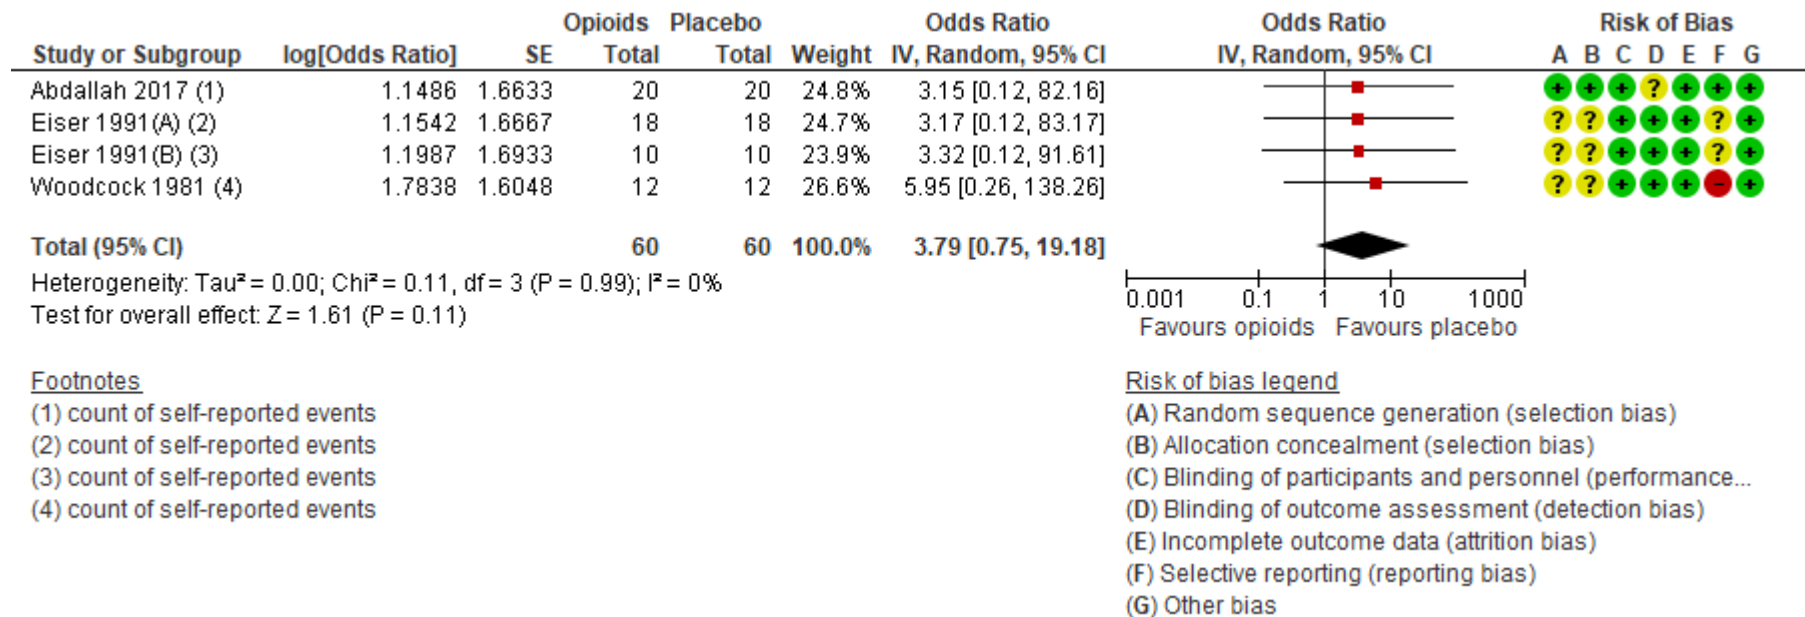

Supplementary Figure S11: Laboratory-based exercise studies reporting adverse events (nausea and/or vomiting)

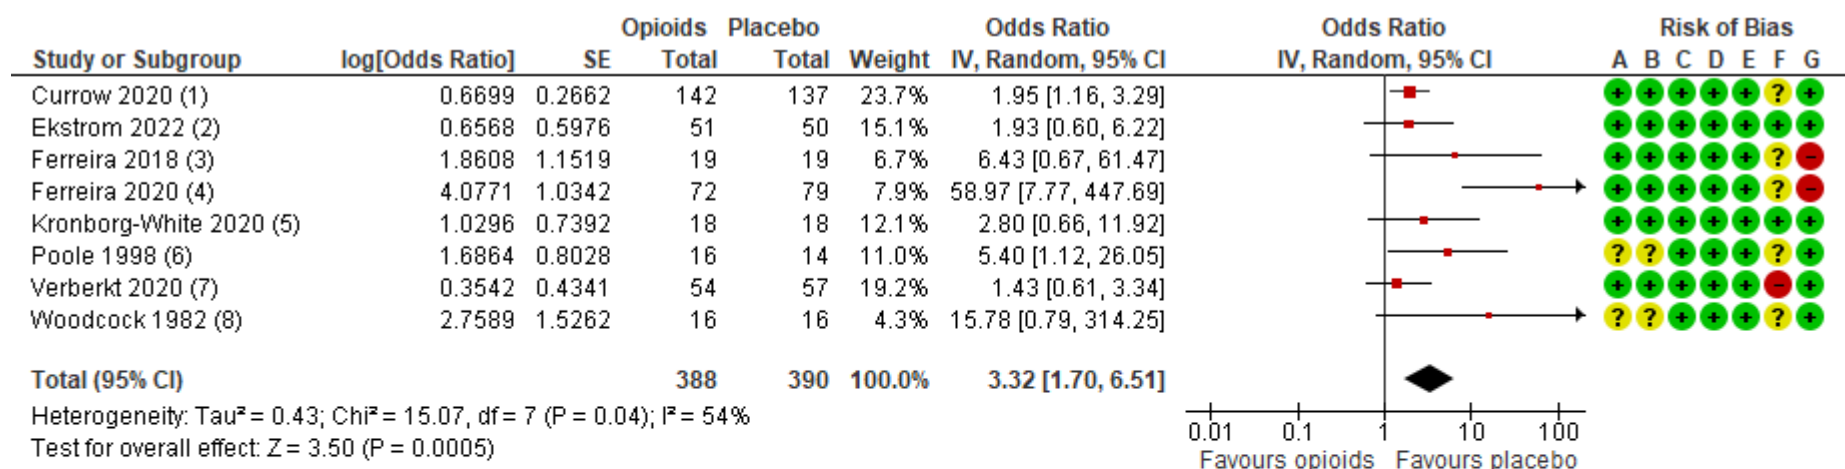

Footnotes

- (1) count of self-reported events
- (2) count of self-reported events
- (3) count of self-reported events
- (4) count of self-reported events
- (5) count of self-reported events
- (6) count of self-reported events
- (7) count of participants with increase of 2 or more points on symptom NRS relative to baseline
- (8) count of self-reported events

Risk of bias legend

- (A) Random sequence generation (selection bias)
- (B) Allocation concealment (selection bias)
- (C) Blinding of participants and personnel (performance...)
- (D) Blinding of outcome assessment (detection bias)
- (E) Incomplete outcome data (attrition bias)
- (F) Selective reporting (reporting bias)
- (G) Other bias

Supplementary Figure S12: At home studies reporting adverse events (nausea and/or vomiting)



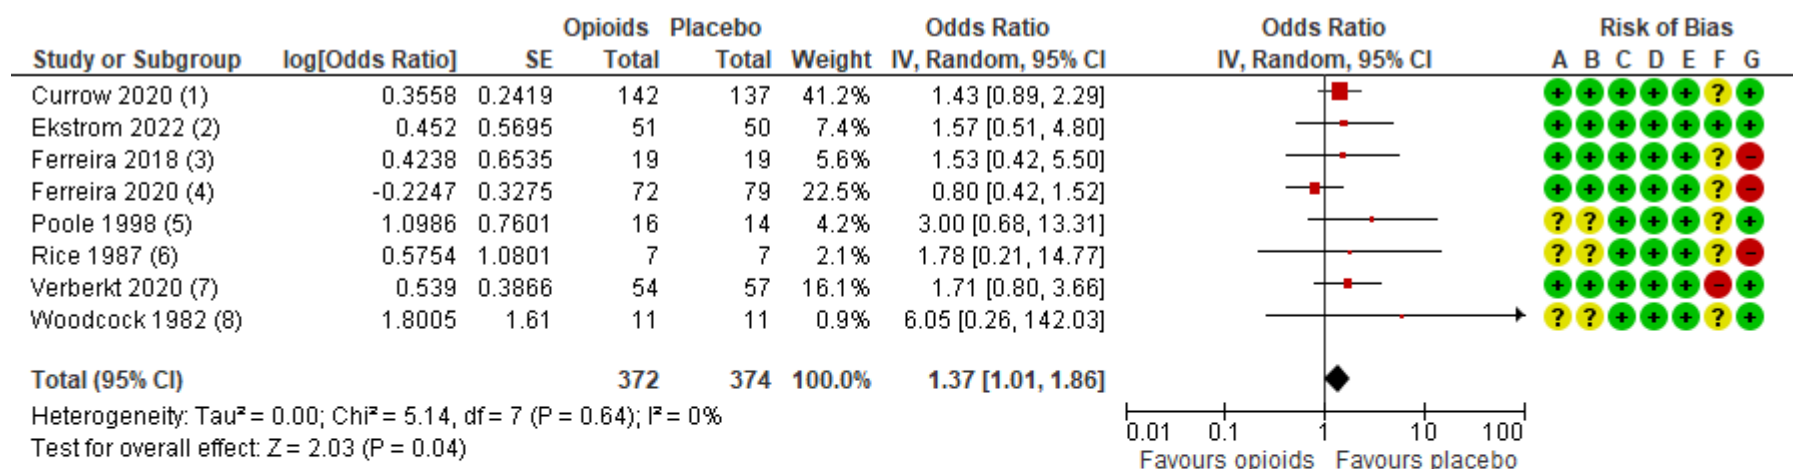

Footnotes

- (1) count of self-reported events
- (2) count of self-reported events
- (3) count of self-reported events
- (4) count of self-reported events
- (5) count of self-reported events
- (6) count of self-reported events
- (7) count of participants with increase of 2 or more points on symptom NRS relative to baseline
- (8) count of self-reported events

Risk of bias legend

- (A) Random sequence generation (selection bias)
- (B) Allocation concealment (selection bias)
- (C) Blinding of participants and personnel (performance...)
- (D) Blinding of outcome assessment (detection bias)
- (E) Incomplete outcome data (attrition bias)
- (F) Selective reporting (reporting bias)
- (G) Other bias

Supplementary Figure S13: At home studies reporting adverse events (drowsiness)

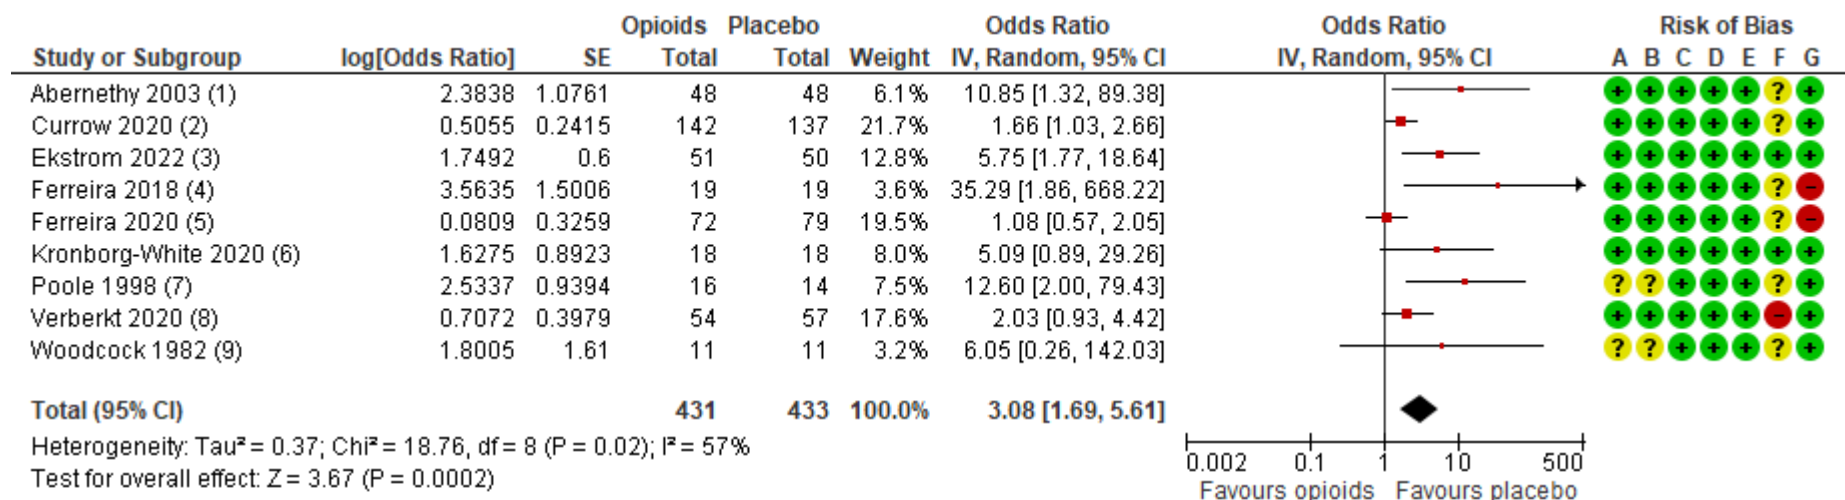

**Footnotes**

- (1) count of self-reported events
- (2) count of self-reported events
- (3) count of self-reported events
- (4) count of self-reported events
- (5) count of self-reported events
- (6) count of self-reported events
- (7) count of self-reported events
- (8) count of participants with increase of 2 or more points on symptom NRS relative to baseline
- (9) count of self-reported events

**Risk of bias legend**

- (A) Random sequence generation (selection bias)
- (B) Allocation concealment (selection bias)
- (C) Blinding of participants and personnel (performance...)
- (D) Blinding of outcome assessment (detection bias)
- (E) Incomplete outcome data (attrition bias)
- (F) Selective reporting (reporting bias)
- (G) Other bias

Supplementary Figure S14: At home studies reporting adverse events (constipation)

Supplementary Table S3: GRADE certainty of evidence in laboratory-based exercise studies

| Certainty assessment                                           |                                      |                      |               |                      |                        |                      | No of patients |            | Effect            |                                                                  | Certainty        | Importance |
|----------------------------------------------------------------|--------------------------------------|----------------------|---------------|----------------------|------------------------|----------------------|----------------|------------|-------------------|------------------------------------------------------------------|------------------|------------|
| No of studies                                                  | Study design                         | Risk of bias         | Inconsistency | Indirectness         | Imprecision            | Other considerations | opioids        | no opioids | Relative (95% CI) | Absolute (95% CI)                                                |                  |            |
| <b>Breathlessness after exercise (iso-time &amp; iso-load)</b> |                                      |                      |               |                      |                        |                      |                |            |                   |                                                                  |                  |            |
| 5                                                              | randomised trials<br>– all crossover | Serious <sup>a</sup> | Not serious   | Serious <sup>b</sup> | Serious <sup>c</sup>   | Yes <sup>d</sup>     | 70             | 70         | -                 | <b>SMD -0.50</b><br>-0.84 to -0.16<br>p=0.004<br>Favours opioids | ⊕○○○<br>very low | CRITICAL   |
| <b>Breathlessness after exercise (iso-time only)</b>           |                                      |                      |               |                      |                        |                      |                |            |                   |                                                                  |                  |            |
| 3                                                              | randomised trials<br>– all crossover | Serious <sup>a</sup> | Not serious   | Serious <sup>b</sup> | Serious <sup>c</sup>   | Yes <sup>d</sup>     | 40             | 40         | -                 | <b>SMD -0.57</b><br>-1.02 to -0.12<br>p=0.01<br>Favours opioids  | ⊕○○○<br>very low | CRITICAL   |
| <b>Breathlessness after exercise (iso-load only)</b>           |                                      |                      |               |                      |                        |                      |                |            |                   |                                                                  |                  |            |
| 2                                                              | randomised trials<br>– all crossover | Serious <sup>a</sup> | Not serious   | Not serious          | Serious <sup>c,e</sup> | Yes <sup>d</sup>     | 30             | 30         | -                 | <b>SMD -0.41</b><br>-0.92 to 0.11<br>p=0.12                      | ⊕○○○<br>very low | CRITICAL   |
| <b>ABG PaCO2 after exercise</b>                                |                                      |                      |               |                      |                        |                      |                |            |                   |                                                                  |                  |            |
| 2                                                              | randomised trials<br>– all crossover | Serious <sup>f</sup> | Not serious   | Serious <sup>b</sup> | Serious <sup>c,g</sup> | Yes <sup>d,a</sup>   | 21             | 21         | -                 | <b>SMD 0.63</b><br>0.0 to 1.26<br>p=0.05                         | ⊕○○○<br>very low | IMPORTANT  |
| <b>ABG PaO2 after exercise</b>                                 |                                      |                      |               |                      |                        |                      |                |            |                   |                                                                  |                  |            |
| 2                                                              | randomised trials<br>– all crossover | Serious <sup>f</sup> | Not serious   | Serious <sup>b</sup> | Serious <sup>c,h</sup> | Yes <sup>d</sup>     | 21             | 21         | -                 | <b>SMD -0.52</b><br>-1.14 to 0.10<br>p=0.10                      | ⊕○○○<br>very low | IMPORTANT  |
| <b>Adverse events – Nausea or vomiting</b>                     |                                      |                      |               |                      |                        |                      |                |            |                   |                                                                  |                  |            |

|   |                                      |                      |             |                      |                       |                  |    |    |   |                                           |                  |           |
|---|--------------------------------------|----------------------|-------------|----------------------|-----------------------|------------------|----|----|---|-------------------------------------------|------------------|-----------|
| 4 | randomised trials<br>– all crossover | Serious <sup>a</sup> | Not serious | Serious <sup>b</sup> | Serious <sup>c+</sup> | Yes <sup>d</sup> | 60 | 60 | - | <b>OR 3.79</b><br>0.75 to 19.18<br>p=0.11 | ⊕○○○<br>very low | IMPORTANT |
|---|--------------------------------------|----------------------|-------------|----------------------|-----------------------|------------------|----|----|---|-------------------------------------------|------------------|-----------|

**CI:** confidence interval; **OR:** risk ratio; **SMD:** standardised mean difference

**Explanations:**

- a. >=50% of weighting comes from studies with uncertainty or high risk for selection bias and reporting bias
- b. All or most studies only include people with COPD
- c. Small numbers of patients in the included studies contributes to imprecision in the outcome estimate
- d. Most studies had risk of carryover effect due to inadequate washout period in crossover design. The carryover effect is not considered under risk of bias in the ROB1 tool, therefore this was considered separately as an additional consideration.
- e. The pooled estimate of the effect of opioids on breathlessness includes both small harm and large benefit
- f. All studies have uncertainty regarding for selection bias and reporting bias
- g. The pooled estimate of the effect of opioids on ABG PaCO<sub>2</sub> includes both large harm and no benefit
- h. The pooled estimate of the effect of opioids on ABG PaO<sub>2</sub> includes both large harm and small benefit
- i. The pooled estimate of the effect of opioids on nausea or vomiting includes both large harm and no harm

**Supplementary Table S4: GRADE certainty of evidence in at home studies**

| Certainty assessment                                                  |                                 |                          |                      |                      |                      |                      | No of patients |            | Effect            |                                                              | Certainty        | Importance |
|-----------------------------------------------------------------------|---------------------------------|--------------------------|----------------------|----------------------|----------------------|----------------------|----------------|------------|-------------------|--------------------------------------------------------------|------------------|------------|
| No of studies                                                         | Study design                    | Risk of bias             | Inconsistency        | Indirectness         | Imprecision          | Other considerations | opioids        | no opioids | Relative (95% CI) | Absolute (95% CI)                                            |                  |            |
| <b>Breathlessness intensity (evening measures or time not stated)</b> |                                 |                          |                      |                      |                      |                      |                |            |                   |                                                              |                  |            |
| 10                                                                    | randomised trials – 5 crossover | Not serious <sup>a</sup> | Serious <sup>b</sup> | Not serious          | Serious <sup>c</sup> | Yes <sup>d</sup>     | 438            | 441        | -                 | <b>SMD -0.10</b><br>-0.64 to 0.44<br>p=0.71                  | ⊕○○○<br>very low | CRITICAL   |
| <b>Breathlessness intensity (morning measures or time not stated)</b> |                                 |                          |                      |                      |                      |                      |                |            |                   |                                                              |                  |            |
| 10                                                                    | randomised trials – 5 crossover | Not serious <sup>a</sup> | Serious <sup>b</sup> | Not serious          | Serious <sup>c</sup> | Yes <sup>d</sup>     | 438            | 441        | -                 | <b>SMD -0.10</b><br>-0.64 to 0.43<br>p=0.71                  | ⊕○○○<br>very low | CRITICAL   |
| <b>Health-Related Quality of Life</b>                                 |                                 |                          |                      |                      |                      |                      |                |            |                   |                                                              |                  |            |
| 6                                                                     | randomised trials – 1 crossover | Not serious <sup>a</sup> | Serious <sup>b</sup> | Not serious          | Serious <sup>e</sup> | No                   | 356            | 359        | -                 | <b>SMD -0.42</b><br>-0.98 to 0.13<br>p=0.13                  | ⊕⊕○○<br>low      | IMPORTANT  |
| <b>Cough</b>                                                          |                                 |                          |                      |                      |                      |                      |                |            |                   |                                                              |                  |            |
| 2                                                                     | randomised trials – 0 crossover | Not serious              | Serious <sup>b</sup> | Not serious          | Serious <sup>f</sup> | No                   | 62             | 69         | -                 | <b>SMD -1.42</b><br>-3.99 to 1.16<br>p=0.28                  | ⊕⊕○○<br>low      | IMPORTANT  |
| <b>ABG PaCO2</b>                                                      |                                 |                          |                      |                      |                      |                      |                |            |                   |                                                              |                  |            |
| 4                                                                     | randomised trials – 2 crossover | Serious <sup>g</sup>     | Serious <sup>b</sup> | Serious <sup>h</sup> | Serious <sup>f</sup> | Yes <sup>i</sup>     | 90             | 93         | -                 | <b>SMD 0.86</b><br>0.03 to 1.69<br>p=0.04<br>favours placebo | ⊕○○○<br>very low | IMPORTANT  |

| ABG PaO2                                                                                                                                                                                                                                                                                                                                                                                                                                                                                                                                                                                                                                                                                                                                                                                                                                                                                                                                                                                                                                                                                                                                                                                                                                                                                                                                                                                                                                                                                                                                                                                                                                                                                                                                                                                 |                                 |                      |                      |                      |                      |                  |     |     |   |                                                               |                  |           |
|------------------------------------------------------------------------------------------------------------------------------------------------------------------------------------------------------------------------------------------------------------------------------------------------------------------------------------------------------------------------------------------------------------------------------------------------------------------------------------------------------------------------------------------------------------------------------------------------------------------------------------------------------------------------------------------------------------------------------------------------------------------------------------------------------------------------------------------------------------------------------------------------------------------------------------------------------------------------------------------------------------------------------------------------------------------------------------------------------------------------------------------------------------------------------------------------------------------------------------------------------------------------------------------------------------------------------------------------------------------------------------------------------------------------------------------------------------------------------------------------------------------------------------------------------------------------------------------------------------------------------------------------------------------------------------------------------------------------------------------------------------------------------------------|---------------------------------|----------------------|----------------------|----------------------|----------------------|------------------|-----|-----|---|---------------------------------------------------------------|------------------|-----------|
| 2                                                                                                                                                                                                                                                                                                                                                                                                                                                                                                                                                                                                                                                                                                                                                                                                                                                                                                                                                                                                                                                                                                                                                                                                                                                                                                                                                                                                                                                                                                                                                                                                                                                                                                                                                                                        | randomised trials – 1 crossover | Serious <sup>j</sup> | Not serious          | Serious <sup>k</sup> | Serious <sup>l</sup> | Yes <sup>i</sup> | 65  | 68  | - | <b>SMD -0.22</b><br>-0.56 to 0.12<br>p=0.21                   | ⊕○○○<br>very low | IMPORTANT |
| Adverse events - Drowsiness                                                                                                                                                                                                                                                                                                                                                                                                                                                                                                                                                                                                                                                                                                                                                                                                                                                                                                                                                                                                                                                                                                                                                                                                                                                                                                                                                                                                                                                                                                                                                                                                                                                                                                                                                              |                                 |                      |                      |                      |                      |                  |     |     |   |                                                               |                  |           |
| 8                                                                                                                                                                                                                                                                                                                                                                                                                                                                                                                                                                                                                                                                                                                                                                                                                                                                                                                                                                                                                                                                                                                                                                                                                                                                                                                                                                                                                                                                                                                                                                                                                                                                                                                                                                                        | randomised trials – 4 crossover | Serious <sup>m</sup> | Not serious          | Not serious          | Serious <sup>n</sup> | No               | 372 | 374 | - | <b>OR 1.37</b><br>1.01 to 1.86<br>p=0.04                      | ⊕⊕○○<br>low      | IMPORTANT |
| Adverse events - Constipation                                                                                                                                                                                                                                                                                                                                                                                                                                                                                                                                                                                                                                                                                                                                                                                                                                                                                                                                                                                                                                                                                                                                                                                                                                                                                                                                                                                                                                                                                                                                                                                                                                                                                                                                                            |                                 |                      |                      |                      |                      |                  |     |     |   |                                                               |                  |           |
| 9                                                                                                                                                                                                                                                                                                                                                                                                                                                                                                                                                                                                                                                                                                                                                                                                                                                                                                                                                                                                                                                                                                                                                                                                                                                                                                                                                                                                                                                                                                                                                                                                                                                                                                                                                                                        | randomised trials – 4 crossover | Serious <sup>o</sup> | Serious <sup>p</sup> | Not serious          | Not serious          | No               | 431 | 433 | - | <b>OR 3.08</b><br>1.69 to 5.61<br>p=0.0002<br>favours placebo | ⊕⊕○○<br>low      | IMPORTANT |
| Adverse events – Nausea or vomiting                                                                                                                                                                                                                                                                                                                                                                                                                                                                                                                                                                                                                                                                                                                                                                                                                                                                                                                                                                                                                                                                                                                                                                                                                                                                                                                                                                                                                                                                                                                                                                                                                                                                                                                                                      |                                 |                      |                      |                      |                      |                  |     |     |   |                                                               |                  |           |
| 8                                                                                                                                                                                                                                                                                                                                                                                                                                                                                                                                                                                                                                                                                                                                                                                                                                                                                                                                                                                                                                                                                                                                                                                                                                                                                                                                                                                                                                                                                                                                                                                                                                                                                                                                                                                        | randomised trials – 3 crossover | Serious <sup>q</sup> | Serious <sup>p</sup> | Not serious          | Not serious          | No               | 388 | 390 | - | <b>OR 3.32</b><br>1.70 to 6.51<br>p=0.0005<br>favours placebo | ⊕⊕○○<br>low      | IMPORTANT |
| <p><b>CI:</b> confidence interval; <b>OR:</b> risk ratio; <b>SMD:</b> standardised mean difference</p> <p><b>Explanations:</b></p> <p>a. Nearly all studies had an unclear risk regarding selective reporting as most did not publish study protocols before publishing trial outcomes. One study was considered at high risk of bias for selective reporting. However, overall the risk of bias from all domains was considered not serious</p> <p>b. Significant heterogeneity identified <math>I^2 &gt; 80\%</math>, which is not explained by differences in study design or study populations</p> <p>c. The pooled estimate of the effect of opioids on breathlessness includes both strong benefit and moderate harm</p> <p>d. 3 of the 5 crossover studies had a risk of carryover effect due to inadequate washout period in crossover design. The carryover effect is not considered under risk of bias in the ROB1 tool, therefore this was considered separately as an additional consideration.</p> <p>e. The pooled estimate of the effect of opioids on QOL includes both small harm and large benefit</p> <p>f. Small numbers of patients in the included studies contributes to imprecision in the outcome estimate</p> <p>g. 45% of weighting comes from studies with uncertainty regarding selection bias and 75% of weighting comes from studies with uncertainty or high risk regarding reporting bias</p> <p>h. 75% of weighting comes from studies with only people with COPD</p> <p>i. 1 of the 2 crossover studies had a risk of carryover effect due to inadequate washout period in crossover design. The carryover effect is not considered under risk of bias in the ROB1 tool, therefore this was considered separately as an additional consideration.</p> |                                 |                      |                      |                      |                      |                  |     |     |   |                                                               |                  |           |

- j. 17% of weighting comes from studies with uncertainty regarding selection bias and 100% of weighting comes from studies with uncertainty or high risk regarding reporting bias
- k. Only patients with COPD included in the studies for this outcome
- l. The pooled estimate of the effect of opioids on PaO<sub>2</sub> includes both moderate harm and small benefit
- m. All but 1 study had uncertainty or high risk regarding reporting bias and 30% of the weighting comes from studies with high risk for other bias
- n. The pooled estimate of the effect of opioids on drowsiness includes both negligible and large harm
- o. 79% of the weighting comes from studies with uncertainty or high risk regarding reporting bias and 23% of the weighting comes from studies with high risk for other bias
- p. Significant heterogeneity identified  $I^2 > 50\%$ , which is not explained by differences in study design or study populations
- q. 73% of the weighting comes from studies with uncertainty or high risk regarding reporting bias and 15% of the weighting comes from studies with high risk for other bias
